# Supplementary material for: Changes in the Expression of Smooth Muscle Cell–Related Genes in Human Dermal Sheath Cup Cells Associated with the Treatment Outcome of Autologous Cell–Based Therapy for Male and Female Pattern Hair Loss
Source: MDPI journal article supplement (doi:10.3390/ijms23137125), 2022-06-27
Supplement: s1 [file s1]

# Supplementary Materials

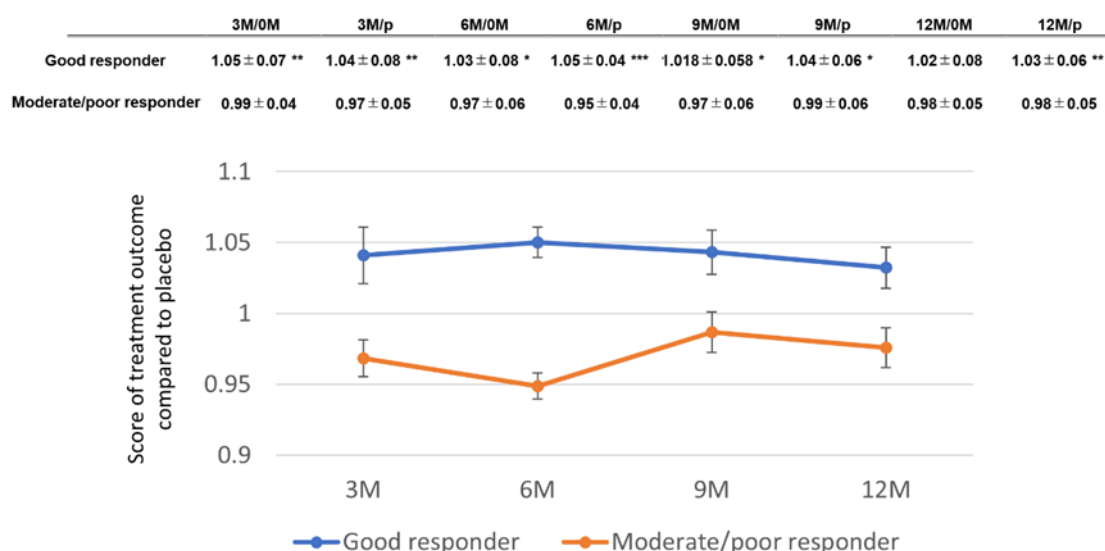

**Figure S1.** Classification of patient groups by the treatment outcome. Patients who participated in the clinical study adopting DCS cell injection into androgenetic alopecia lesions were divided into good responder (n = 16) and moderate/poor responder (n = 16) groups based on the treatment outcome at 6 months vs. the placebo calculated by the change in measured total hair density. The score of each group at 3, 6, 9, and 12 months vs. day 0 (3M/0M, 6M/0M, 9M/0M, and 12M/0M), and vs. the placebo (3M/p, 6M/p, 9M/p, and 12M/p) was plotted. Scores are expressed as the mean ± S.D. Student's t-test was applied for comparisons between the two groups (\*P < 0.05, \*\*P < 0.01, \*\*\*P < 0.001). The line graph illustrates the data of 3, 6, 9, and 12 months vs. the placebo (mean ± S.E.).

**Table S1.** Primer pairs used for qRT-PCR.

| Gene name     | Forward (5' to 3')        | Reverse (5' to 3')         |
|---------------|---------------------------|----------------------------|
| ACTA2         | ATTGCCGACCGAATGCAGAAGG    | GGCTTCATCGTATTCCTGTTTGCTG  |
| CALD1         | GTCTGTGCAGAAAAGCAGTGG     | TGCCGGCTTTGTAGGTTTTG       |
| MYOCD         | CCCAGCCACCAGTCAGATG       | GGCTTTTTGTGGCGGTTCTT       |
| SRF           | CCTACCAGGTGTCGGAGTCT      | AGGTGCTAGGTGCTGTTGG        |
| PPAR $\gamma$ | CTTCACTACTGTTGACTTCTCCAGC | GAGGCTTATTGTAGAGCTGAGTCTTC |
| CEBP $\alpha$ | AAGTCGGTGGACAAGAACAGCAAC  | AGTTCGCGGCTCAGCTGTTC       |
| PDGFR $\beta$ | CTGCTTCTCGAGAGACTGTTGG    | TGCACGGCAGTATAGAGGACG      |
| CSPG4         | CATGATACCCTAGAGCTCCAGC    | CCAAGAGATTGGAGGCATCCAG     |
| nestin        | TCAAGATGTCCCTCAGCCTGG     | ACTGGGAGCAAAGATCCAAGACG    |
| Sox2          | GGAAATGGGAGGGGTGCAAAAGAGG | TTGCGTGAGTGTGGATGGGATTGGTG |
| GAPDH         | GAGTCAACGGATTTGGTCGT      | TGGGATTTCATTGATGACA        |
